# Supplementary material for: Lipid Droplet Accumulation Independently Predicts Poor Clinical Prognosis in High-Grade Serous Ovarian Carcinoma
Source: MDPI journal article supplement (doi:10.3390/cancers13205251), 2021-10-19
Supplement: s1 [file s1]

## Lipid droplet accumulation independently predicts poor clinical prognosis in high-grade serous ovarian carcinoma

Naoyuki Iwahashi,<sup>1,6</sup> Midori Ikezaki,<sup>2,6</sup> Masakazu Fujimoto,<sup>3</sup> Yoshihiro Komohara,<sup>4</sup> Yukio Fujiwara,<sup>4</sup> Madoka Yamamoto,<sup>1</sup> Mika Mizoguchi,<sup>1</sup> Kentaro Matsubara,<sup>2</sup> Yudai Watanabe,<sup>2</sup> Ibu Matsuzaki,<sup>5</sup> Shin-ichi Murata,<sup>5</sup> Yoshito Ihara,<sup>2</sup> Kazuhiko Ino,<sup>1</sup> and Kazuchika Nishitsuji<sup>2,\*</sup>

<sup>1</sup>Department of Obstetrics and Gynecology, Wakayama Medical University, 641-8509 Wakayama, Ja-pan; naoyuki@wakayama-med.ac.jp (N.I.); madoka-y@wakayama-med.ac.jp (M.Y.); ma-ika@wakayama-med.ac.jp (M.M.); kazuino@wakayama-med.ac.jp (K.I.); <sup>2</sup>Department of Biochemistry, Wakayama Medical University, 641-8509 Wakayama, Japan; ikeza-ki@wakayama-med.ac.jp (M.I.); d1766082@wakayama-med.ac.jp (K.M.); d1766099@wakayama-med.ac.jp (Y.W.); y-ihara@wakayama-med.ac.jp (Y.I.), nishit@wakayama-med.ac.jp (K.N.); <sup>3</sup>Department of Diagnostic Pathology, Kyoto University, 606-8507 Kyoto, Japan; fuji-masa@kuhp.kyoto-u.ac.jp (M.F.); <sup>4</sup>Department of Cell Pathology, Graduate School of Medical Sciences, Kumamoto University, 860-8556 Kumamoto, Japan; ycomo@kumamoto-u.ac.jp (Y.K.); fuji-y@kumamoto-u.ac.jp (Y.F.); <sup>5</sup>Department of Human Pathology, Wakayama Medical University, 641-8510 Wakayama, Japan; m\_ibu@wakayama-med.ac.jp (I.M.); smurata@wakayama-med.ac.jp (S.-i.M.);

<sup>6</sup>These authors contributed equally to this work.

\*Correspondence: Kazuchika Nishitsuji, PhD, Department of Biochemistry, Wakayama Medical University, 811-1 Kimiidera, Wakayama 641-8509, Japan, E-mail: nishit@wakayama-med.ac.jp; Phone/fax: +81-73-441-0628

## **Supplemental Procedures**

### **Analysis of proliferation, lipid droplet (LD) accumulation, and adipophilin (ADP) expression**

OVCAR-3 cells were cultured with different concentrations of glucose (2.25, 4.5, or 9.0 g/l) or in the absence or presence of K604 (10  $\mu$ M), TMP-153 (200 nM; Cayman Chemical, Ann Arbor, MI, USA), Sandoz 58-035 (5  $\mu$ M; Santa Cruz Biotechnology, Dallas, TX, USA), or amidepsine A (20  $\mu$ M; Cayman Chemical) for 72 h 37 °C, after which cell viability was determined by using the WST-1 cell proliferation assay (Roche, Basel, Switzerland) according to the manufacturer's protocol.

LDs were visualized by using the fluorescent probe Lipi-Green according to the manufacturer's procedure (Dojindo, Kumamoto, Japan). ADP expression was analyzed by means of Western blotting and immunocytochemistry with an anti-ADP antibody (LifeSpan Biosciences, Seattle, WA, USA). For Western blotting, OVCAR-3 cells were plated on 6-well culture plates and cultured as described above. Whole-cell lysates were prepared by means of the trichloroacetic acid precipitation method. Briefly, cells were washed three times with phosphate-buffered saline (PBS) and were then fixed with 10% (w/v) trichloroacetic acid in PBS on ice for 30 min, after which samples were centrifuged at 3000  $\times$  g for 15 min at 4 °C. Precipitates were dissolved in sodium dodecyl sulfate-polyacrylamide gel electrophoresis sample buffer [0.125 M Tris-HCl; 4% (w/v) SDS, 20% (v/v) glycerol, 12% (v/v) 2-mercaptoethanol, and 0.01% (w/v) bromo-phenol blue]. Lysates were subjected to sodium dodecyl sulfate-polyacrylamide gel electrophoresis with 5–20% gradient gels and were then transferred to polyvinylidene difluoride membranes (Millipore, Billerica, MA, USA). ADP on the membranes was probed with an anti-ADP antibody (1:1000) followed by use of a horseradish peroxidase-labeled anti-rabbit antibody (1:10,000; Cell Signaling Technology) and ImmunoStar LD (Wako Pure Chemical). Protein contents of cell lysates were normalized to  $\beta$ -actin expression levels. Signals were detected by using a WSE-6100 LuminoGraph I (ATTO Corporation, Tokyo, Japan). For immunocytochemical analysis, OVCAR-3 cells were plated on poly-l-lysine-coated cover glasses and cultured as described above. Cells were then fixed with 4% paraformaldehyde in PBS for 20 min at room temperature. After being washed three times with PBS, cells were blocked and permeabilized with Animal-Free Blocker (Vector Laboratories, Burlingame, CA, USA) containing 0.05% saponin for 20 min at room temperature. They were then incubated with an anti-ADP antibody (1:100) followed by a Cy3-conjugated secondary antibody (1:1000; Jackson ImmunoResearch, West Grove, PA, USA). Specimens were mounted with Vibrance Antifade Mounting Medium with DAPI (Vector Laboratories) and were examined with an LSM700 microscope (Zeiss,

Oberkochen, Germany).

#### **Analysis of LD accumulation and ADP expression in OVKATE cells**

Another HGSOC cells, OVKATE cells were from the Japanese Collection of Research Bioresources Cell Bank (Osaka, Japan) and maintained in RPMI 1640 (Wako Pure Chemical, Osaka, Japan) supplemented with 10% heat-inactivated fetal bovine serum (Biowest, Nuaillé, France), 100 U/ml penicillin, and 100 µg/ml streptomycin (Wako Pure Chemical) at 37 °C in a 5% CO<sub>2</sub> atmosphere. OVKATE cells were cultured with different concentrations of glucose (0, 2.25, or 4.5 g/l), and LD accumulation and ADP expression were analyzed as described above.

#### **Statistical analysis**

Statistical comparisons were performed by means of the unpaired Student's t test or one-way analysis of variance followed by Dunnett's test or Bonferroni's test by using Prism software (GraphPad Software, Version 7.04, La Jolla, CA, USA). Results were said to be significant when p values were less than 0.05.

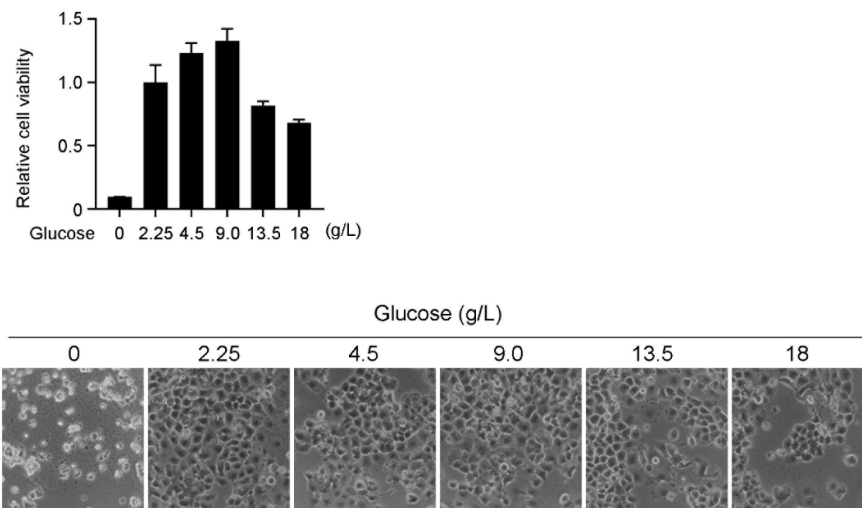

**Supplemental Figure S1 Effect of glucose concentrations on proliferation of OVCAR-3 cells**

OVCAR-3 cells were cultured at various glucose concentrations for 72 h, and proliferation was analyzed by using the WST assay. Phase contrast images of OVCAR-3 cells at each glucose concentration are also shown.

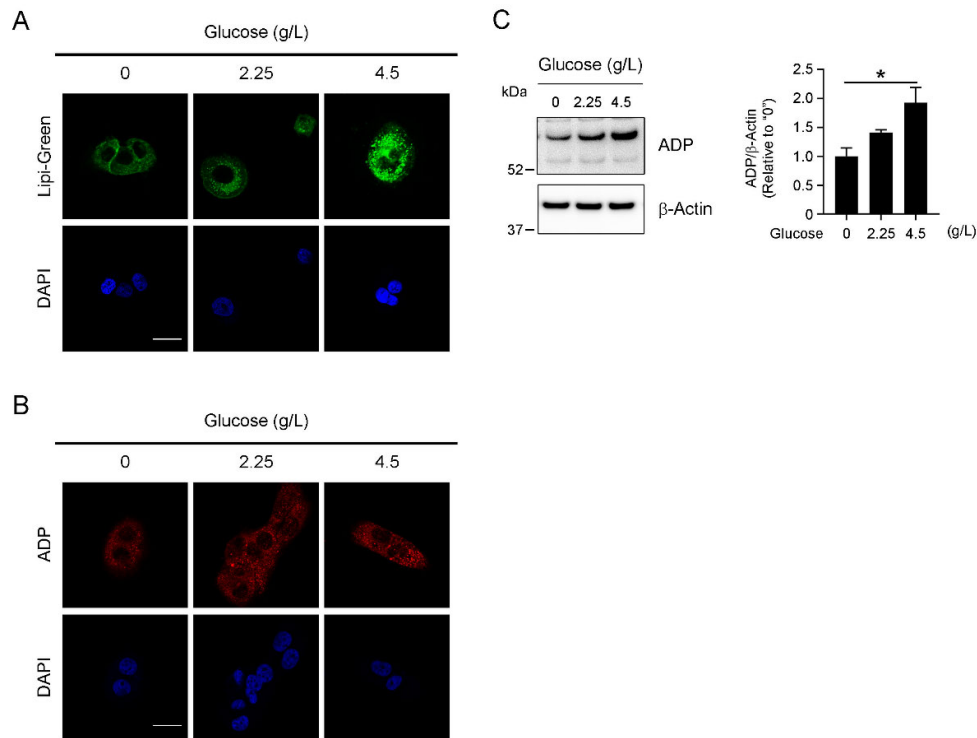

**Supplemental Figure S2 Glucose-dependent LD formation in OVKATE cells.** **A** OVKATE cells were cultured with 0, 2.25 g/l, or 4.5 g/l glucose for 72 h, after which LDs in OVKATE cells were visualized by using the lipophilic Lipi-Green. **B** After being cultured as described in (A), cells were fixed with 4% paraformaldehyde and immunostained with an anti-ADP antibody. Scale bars: 20  $\mu$ m. **C** After being cultured as described in (A), ADP expression was analyzed by means of Western blotting with the anti-ADP antibody. Data are means  $\pm$  S.E. of three independent experiments.  $\beta$ -Actin was used as a loading control. \* $P$  < 0.05.

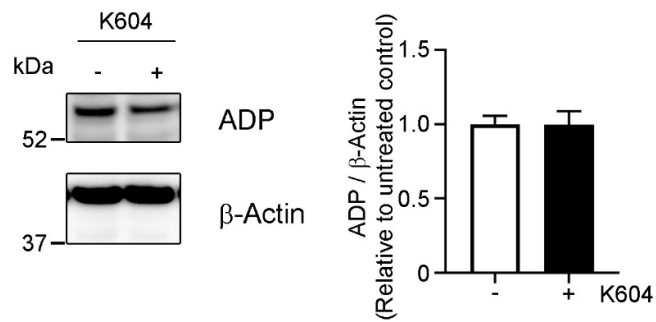

**Supplemental Figure S3 No effect of K604 (10  $\mu$ M) treatment on ADP protein levels.** OVCAR-3 cells were treated with K604 (10  $\mu$ M) for 72 h, after which ADP expression was analyzed by means of Western blotting. Data are means  $\pm$  S.E. of three independent experiments.  $\beta$ -Actin was used as a loading control.

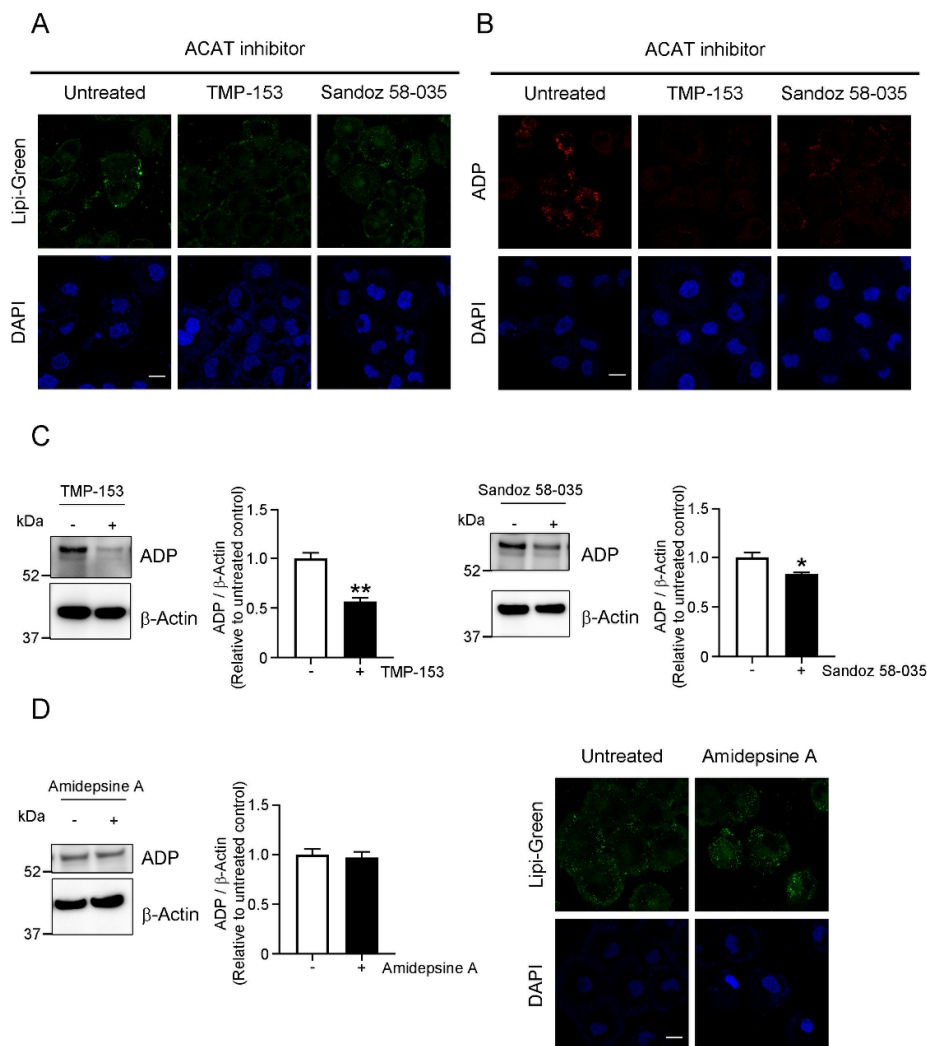

**Supplemental Figure S4 Effects of TMP-153 and Sandoz 58-035, acyl-coenzyme A: cholesterol acyltransferase (ACAT) inhibitors, and amidepsine A, an acyl CoA: diacylglycerol acyltransferase inhibitor, on LD formation and ADP protein levels in OVCAR-3 cells.**

OVCAR-3 cells were treated with TMP-153 (200 nM) or Sandoz 58-035 (5  $\mu$ M) for 72 h, after which LD formation and ADP expression were analyzed by using Lipi-Green (A), ADP immunostaining (B), and Western blotting with an anti-ADP antibody (C). (D) OVCAR-3 cells were treated with amidepsine A (20  $\mu$ M) for 72 h, after which LD formation and ADP expression were analyzed by using Lipi-Green and Western blotting, respectively. Scale bars: 20  $\mu$ m. Data are means  $\pm$  S.E. of three independent experiments.  $\beta$ -Actin was used as a loading control. \* $P$  < 0.05; \*\* $P$  < 0.01.
